# Supplementary material for: Large-Scale Crossbar Arrays based on Three-Terminal MoS2-based Memtransistors
Source: Research Square preprint supplement (doi:10.21203/rs.3.rs-5845160/v1), 2025-01-21
Supplement: Supplementary file 1 [file 746e8868a324db029873126a.pdf]

# Supporting Information

## *Large-Scale Crossbar Arrays based on Three-Terminal MoS<sub>2</sub>-based Memtransistors*

*Thomas F. Schranghamer<sup>1</sup>, Andrew Pannone<sup>1</sup>, Chen Chen<sup>2</sup>, Thomas McKnight<sup>3,4</sup>, Sean Tadekawa<sup>5</sup>, Evan Haines<sup>5</sup>, Richard Ordonez<sup>5</sup>, Cody Hayashi<sup>5</sup>, Joan M. Redwing<sup>2,3,4</sup>, and Saptarshi Das<sup>1,2,4,6,\*</sup>*

<sup>1</sup>*Engineering Science and Mechanics, Penn State University, University Park, PA 16802, USA*

<sup>2</sup>*2D Crystal Consortium Materials Innovation Platform, Materials Research Institute, Penn State University, University Park, PA 16802, USA*

<sup>3</sup>*Materials Science and Engineering, Penn State University, University Park, PA 16802, USA*

<sup>4</sup>*Materials Research Institute, Penn State University, University Park, PA 16802, USA*

<sup>5</sup>*Naval Information Warfare Center Pacific, Pearl City, HI 96782, USA*

<sup>6</sup>*Electrical Engineering and Computer Science, Penn State University, University Park, PA 16802, USA*

<sup>\*</sup>*Corresponding Author: Email address: [sud70@psu.edu](mailto:sud70@psu.edu), [das.sapt@gmail.com](mailto:das.sapt@gmail.com)*

### Supplementary Information 1

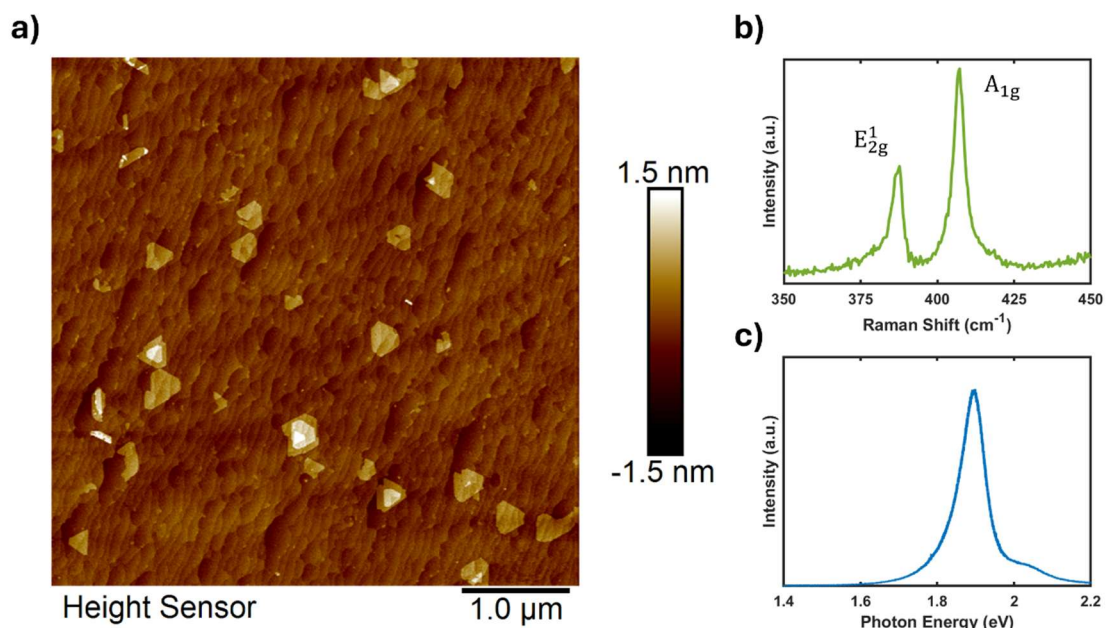

**Figure S1. Characterization of As-Grown MoS<sub>2</sub> Film.** a) Atomic force microscopy (AFM) of the as-grown MoS<sub>2</sub> film on sapphire, showing that the MoS<sub>2</sub> used in this study was predominantly monolayer with intermittent multilayer islands. b) Raman spectra of the as-grown MoS<sub>2</sub> film. The characteristic E<sub>2g</sub><sup>1</sup> and A<sub>1g</sub> peaks of MoS<sub>2</sub> can be clearly seen. c) Photoluminescence (PL) spectra of the as-grown MoS<sub>2</sub> film showing an A-exciton peak position of ~1.9 eV, which is typical for as-grown monolayer MoS<sub>2</sub> on sapphire.

## Supplementary Information 2

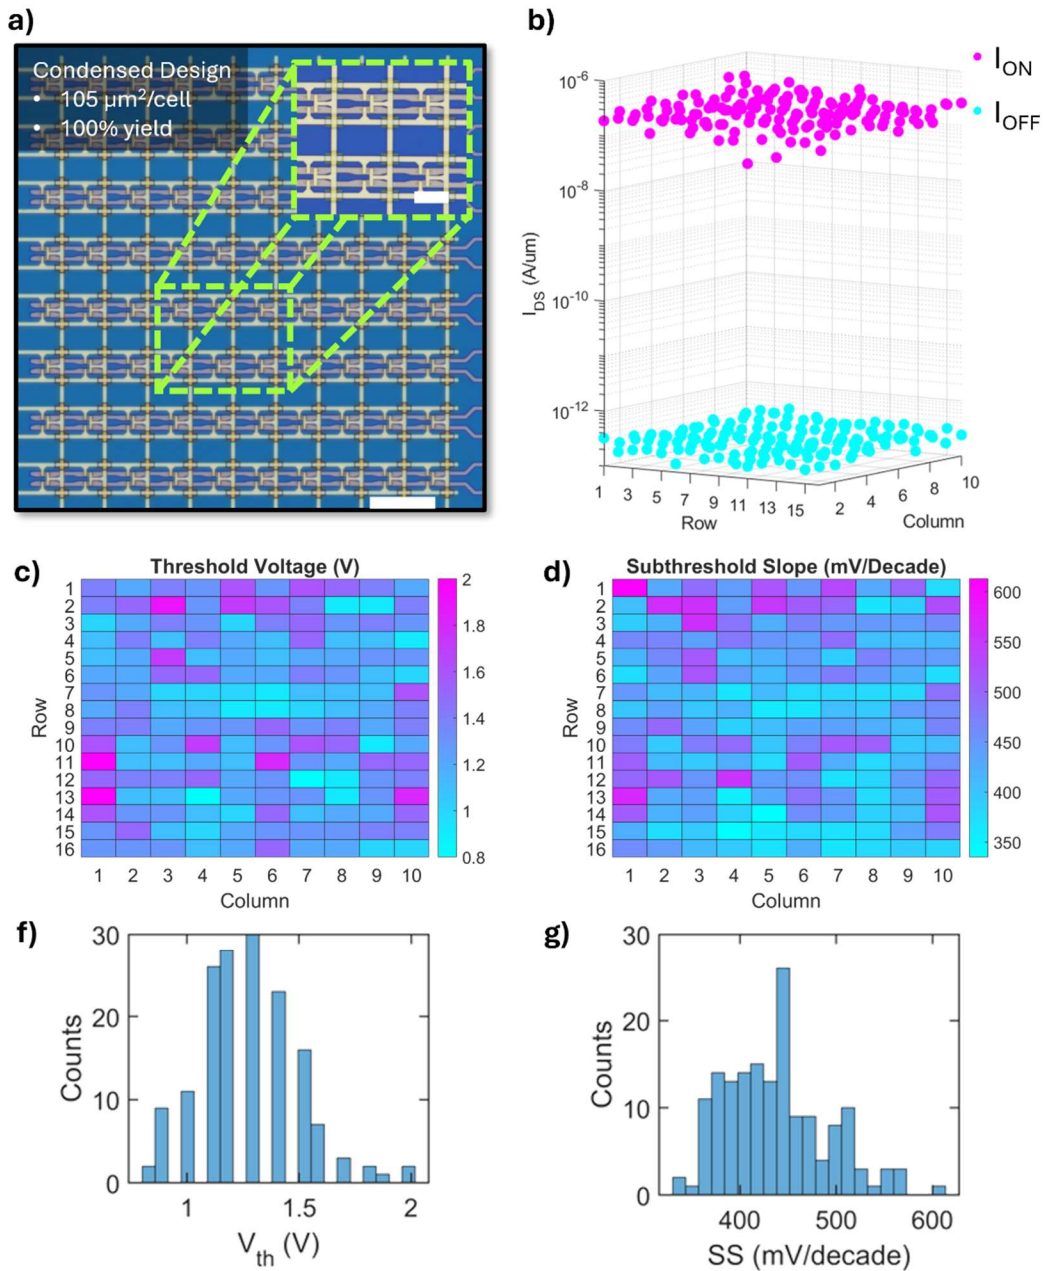

**Figure S2. Overview of Condensed Crossbar Array Architecture.** a) Optical image of a representative 16 $\times$ 10 MoS<sub>2</sub>-memtransistor-based crossbar array based on an alternative design from that reported in **Figure 1**, denoted here as ‘Condensed’. This design features a non-volatile memory (NVM) cell area of 105  $\mu\text{m}^2/\text{cell}$ , an  $\sim$ 84.5% reduction from the base design discussed in **Figure 1** and elsewhere in the main text; this corresponds to an information density of  $\sim$ 0.95 Mb/cm<sup>2</sup> for 1-bit operation. Inset shows a zoomed-in image of constituent memtransistors. Scale bar denotes 25  $\mu\text{m}$  (10  $\mu\text{m}$  for inset). b) Three-dimensional scatter plot showing distribution of ON-state and OFF-state currents taken at a drain-to-source voltage ( $V_{\text{DS}}$ ) of 1 V, denoted as  $I_{\text{ON}}$  (pink) and  $I_{\text{OFF}}$  (cyan), respectively, across the 16 $\times$ 10 array. Notably, all 160 devices in the array were found to work (100% yield) despite the reduction in cell area from the base design. c-d) Maps of threshold voltage ( $V_{\text{th}}$ ) and subthreshold slope (SS), respectively, across the array. e-f) Histograms of  $V_{\text{th}}$  and SS, respectively, for the 160 devices in the array.

### Supplementary Information 3

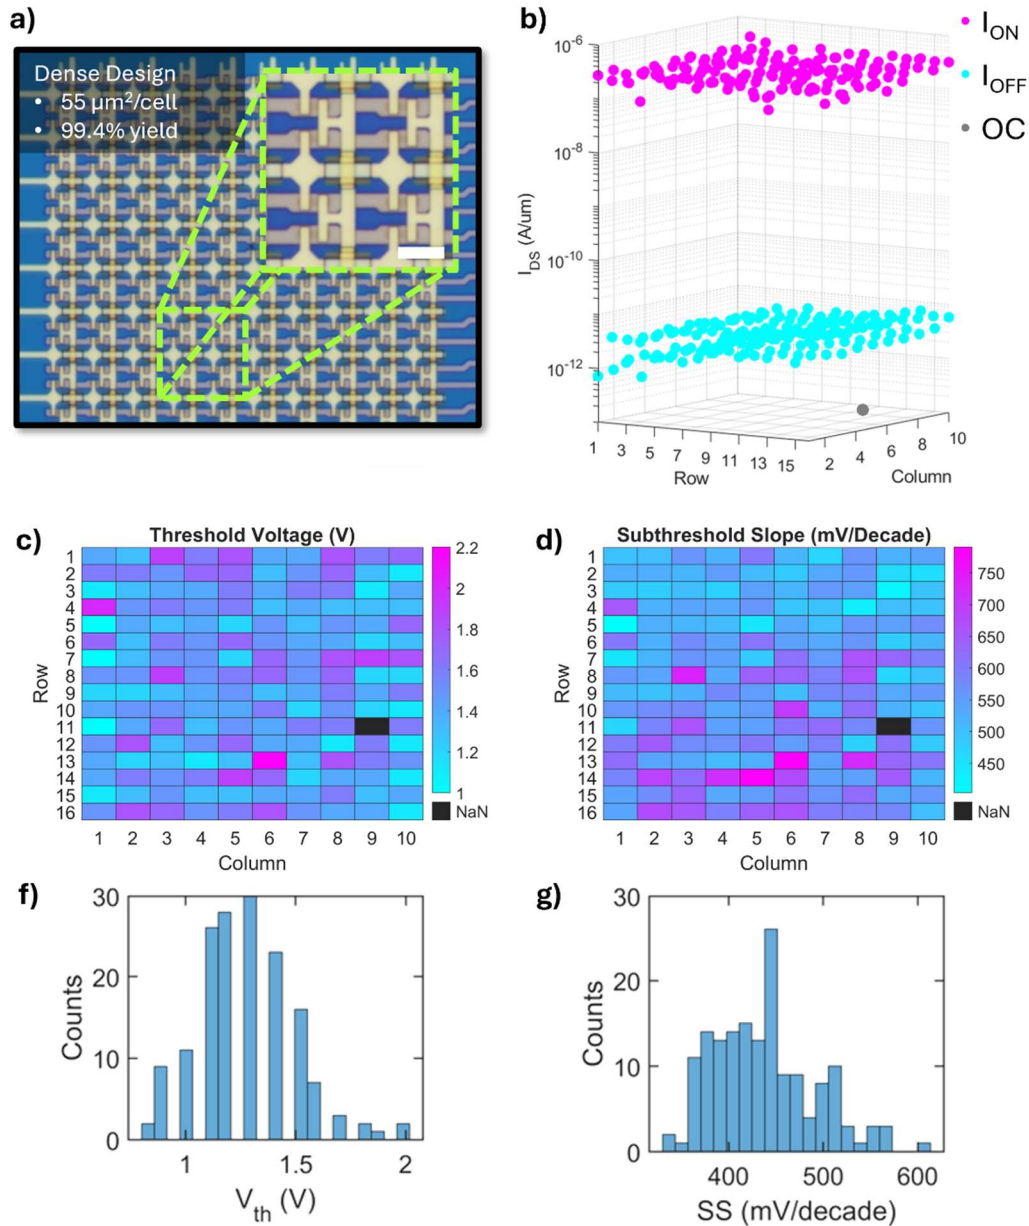

**Figure S3. Overview of Dense Crossbar Array Architecture.** a) Optical image of a representative 16×10 MoS<sub>2</sub>-memtransistor-based crossbar array based on an alternative design from that reported in **Figure 1**, denoted here as ‘Dense’. This design features an NVM cell area of 51.5  $\mu\text{m}^2/\text{cell}$ , an ~92.4% reduction from the base design discussed in **Figure 1** and elsewhere in the main text; this corresponds to an information density of ~1.94 Mb/cm<sup>2</sup> for 1-bit operation. Inset shows a zoomed-in image of constituent memtransistors. Scale bar denotes 20  $\mu\text{m}$  (5  $\mu\text{m}$  for inset). b) Three-dimensional scatter plot showing distribution of  $I_{ON}$  (pink) and  $I_{OFF}$  (cyan) taken at  $V_{DS} = 1$  V across the 16×10 array; devices/cells marked in gray registered as an open circuit (OC) when measured. Notably, 159/160 devices in the array were found to work (99.4% yield) which is comparable to the base design despite the reduction in cell area. c-d) Maps of  $V_{th}$  and SS, respectively, across the array. e-f) Histograms of  $V_{th}$  and SS, respectively, for the 159 working devices in the array.

## Supplementary Information 4

| Table 1: Crossbar-Level Demonstrations based on 2D Materials |                     |                         |           |            |                     |                                 |                                   |                                     |           |                         |           |
|--------------------------------------------------------------|---------------------|-------------------------|-----------|------------|---------------------|---------------------------------|-----------------------------------|-------------------------------------|-----------|-------------------------|-----------|
| Device Structure                                             | Active Length/Width | Cell Area               | Yield (%) | Array Size | Array Configuration | Switching Energy Consumption    | Retention (Exp./Calc.)            | ON/OFF Ratio                        | Terminals | Multi-level Capability? | Reference |
| MoS <sub>2</sub> Memtransistor                               | 1 μm / 1 μm         | 676 μm <sup>2</sup>     | 92.2      | 64×32      | 1T                  | ~ 20 pJ (base), ~ 0.2 fJ (peak) | > 4*10 <sup>3</sup> s / ~3.17 yrs | ~10 <sup>5</sup>                    | 3         | Y                       | This Work |
| MoS <sub>2</sub> Memtransistor                               | 1 μm / 1 μm         | ~ 105 μm <sup>2</sup>   | 100       | 16×10      | 1T                  | ~ 20 pJ (base), ~ 0.2 fJ (peak) | > 4*10 <sup>3</sup> s / ~3.17 yrs | ~10 <sup>5</sup>                    | 3         | Y                       | This Work |
| MoS <sub>2</sub> Memtransistor                               | 1 μm / 1 μm         | ~ 51.5 μm <sup>2</sup>  | 99.4      | 16×10      | 1T                  | ~ 20 pJ (base), ~ 0.2 fJ (peak) | > 4*10 <sup>3</sup> s / ~3.17 yrs | ~10 <sup>4</sup>                    | 3         | Y                       | This Work |
| MoS <sub>2</sub> FGFET                                       | ~3.1 μm / ~49.5 μm  | ~ 32500 μm <sup>2</sup> | 83.1      | 32×32      | 1T                  | NA (~ 8 - 20 nJ estimated)      | > 3.5*10 <sup>3</sup> s / NA      | ~ 100 - 300                         | 3         | Y                       | [1]       |
| MoS <sub>2</sub> Memtransistor                               | 0.4 μm / 20 μm      | ~ 4000 μm <sup>2</sup>  | 64        | 10×10      | 1T                  | ~ 20 fJ                         | > 800 min / NA                    | > 100                               | 3         | Y                       | [2]       |
| MoS <sub>2</sub> Memtransistor                               | 0.9 μm / 0.7 μm     | ~ 5 μm <sup>2</sup>     | NA        | 10×9       | 1T                  | ~ 20 nJ                         | > 10 <sup>5</sup> s / > 10 yrs    | > 1000                              | 4         | Y                       | [3]       |
| MoS <sub>2</sub> Memristor                                   | 1 μm / 50 μm        | ~ 7250 μm <sup>2</sup>  | NA        | 2x2        | 1T-1R               | NA                              | > 3.6*10 <sup>3</sup> s / NA      | ~ 10 <sup>5</sup> - 10 <sup>6</sup> | 2         | Y                       | [4]       |
| Au/h-BN/Au Memristor                                         | 5 μm / 5 μm         | ~ 100 μm <sup>2</sup>   | NA        | 10×10      | 1R                  | 5.47 pJ                         | NA / NA                           | ~10 <sup>6</sup>                    | 2         | Y                       | [5]       |
| Au/MoS <sub>2</sub> /Ag Memristor                            | 30 μm <sup>2</sup>  | NA                      | NA        | 4x4        | 1R                  | NA                              | > 2*10 <sup>5</sup> s / NA        | ~10 <sup>5</sup>                    | 2         | N                       | [6]       |
| Pt/MoS <sub>2</sub> /Ag Memristor                            | 10 μm / 10 μm       | NA                      | NA        | 4x4        | 1R                  | 20 μJ                           | > 10 <sup>4</sup> s / NA          | ~ 10                                | 2         | N                       | [7]       |
| Pt/MoS <sub>2</sub> /Ti Memristor                            | 5 μm / 5 μm         | ~ 900 μm <sup>2</sup>   | NA        | 6x6        | 1R                  | ~ 40 pJ                         | > 10 <sup>5</sup> s / > 3 yrs     | ~ 100                               | 2         | Y                       | [8]       |
| Au/h-BN/Au Memristor                                         | 3 μm / 3 μm         | ~25 μm <sup>2</sup>     | 98 (DA)   | 10×10      | 1R                  | ~ 2.9 μJ                        | > 100 s / NA                      | > 10 <sup>5</sup>                   | 2         | Y                       | [9]       |

NA: Not announced

DA: Different arrays; data taken across multiple experimental crossbar arrays

**Supplemental Table 1. Crossbar-Level Demonstrations based on 2D Materials.** Benchmarking of this work against extant demonstrations of crossbar arrays based on 2D materials<sup>1-9</sup>. The cell areas for the arrays developed in this work range from 676 μm<sup>2</sup> (base design) to 51.5 μm<sup>2</sup> (densest design), demonstrating our ability to successfully scale our crossbar array architectures to information densities of up to 1.94 Mb/cm<sup>2</sup> (assuming 1-bit operation). However, even the base design displays a significantly higher integration density than almost all experimentally demonstrated 2D-material-based arrays to-date; while some reports have demonstrated integration densities down to ~5 μm<sup>2</sup> per cell, the ultimate array size of those works was significantly less than that achieved in this effort. Notably, only a single other work has demonstrated comparable array sizes to ours, though at a significantly lower yield than what we have thus far demonstrated. Our array architectures also compare favorably in terms of switching energy, ranging from tens of pJ (base) to below 1 fJ (peak); all switching energies shown here were estimated using the equation  $Energy = Time \times Current \times Voltage$ , which is commonly used to estimate switching energy for NVMs. The terms “base” and “peak” included in the assessment of our work refer to the pulse time (switching time), with base referring to our typical pulse time of 100 ns and peak referring to our minimum confirmed pulse time of 1 μs. While several of the other works included in this comparison also utilized ultrafast switching times, our NVM capabilities being controlled by the gate means that the switching current of our devices is limited to the gate leakage current, which remained in the region of several tens of pA even at the largest gate biases applied (~10 V), thus allowing for severely reduced energy expenditure. Other metrics (retention, ON/OFF ratio, number of terminals, and ability to realize multiple memory states) compare similarly to other demonstrations, indicating suitability for future applications.

**Supplementary Information 5**

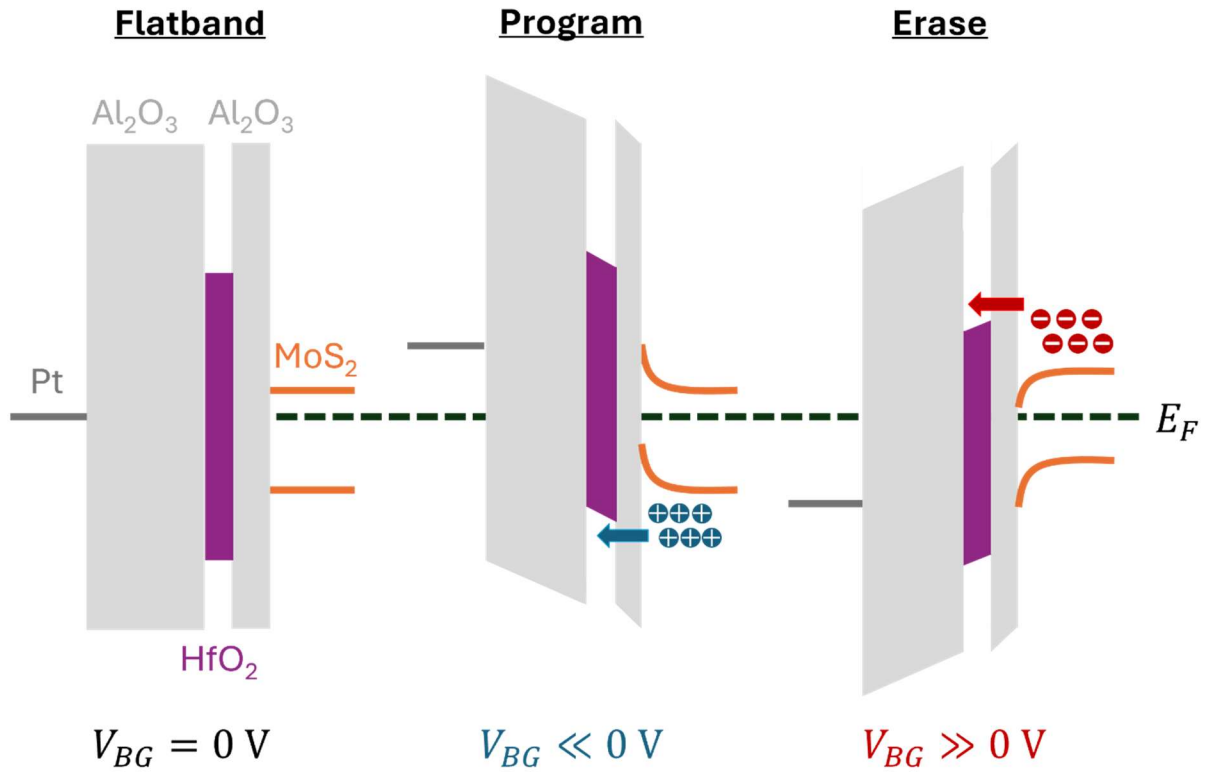

**Figure S4. Band diagram of  $\text{Al}_2\text{O}_3/\text{HfO}_2/\text{Al}_2\text{O}_3$  gate dielectric stack.** The  $\text{Al}_2\text{O}_3/\text{HfO}_2/\text{Al}_2\text{O}_3$  gate dielectric stack enables non-volatile memory in 2D  $\text{MoS}_2$  memtransistors by allowing the trapping/detrapping of charge carriers in the  $\text{HfO}_2$  (charge-trapping) layer when bias pulses of sufficient magnitude are applied to the back-gate. The polarity of the pulse determines which charge carriers are trapped/detrapped, with holes (electrons) being trapped when negative (positive) pulses are applied, and vice versa. These trapped charges screen the electric field across the  $\text{MoS}_2$  channel, changing the conductance of the device and allowing for the realization of distinct conductance (memory) states.

## Supplementary Information 6

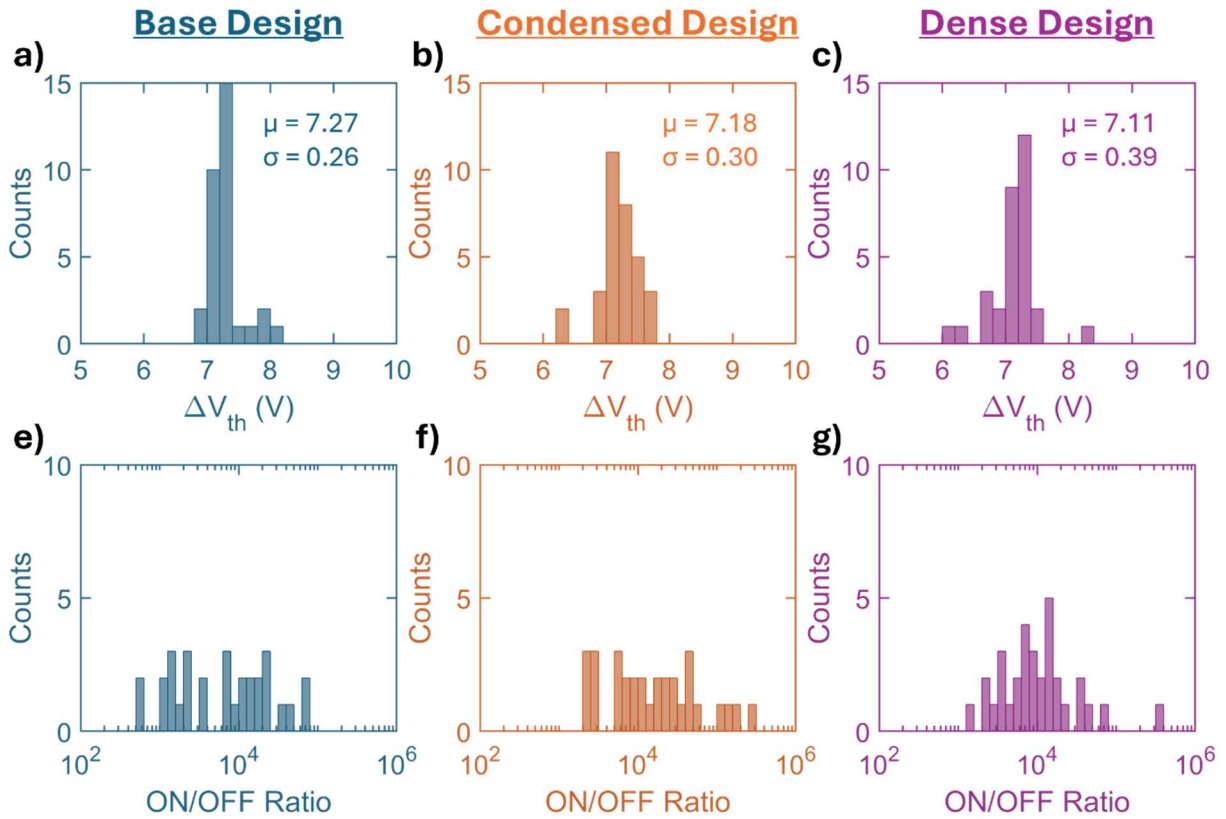

**Figure S5. Analysis of Memory Window and Read Margin in MoS<sub>2</sub>-Memtransistor-based Crossbar Arrays.** a-c) Histograms of the memory window ( $\Delta V_{th}$ ) for cells in crossbar arrays of the base design (Figure 1), condensed design (Supplementary Information 2), and dense design (Supplementary Information 3), respectively. The means ( $\mu$ ) and standard deviations ( $\sigma$ ) are noted for each case. d-f) Histograms of the read margin (ON/OFF ratio) for same arrays as in (a-c). Similar distributions, means, and standard deviations can be seen for all cases, indicating that the different crossbar array architectures developed in this work operate similarly despite design variations.

**Supplementary Information 7**

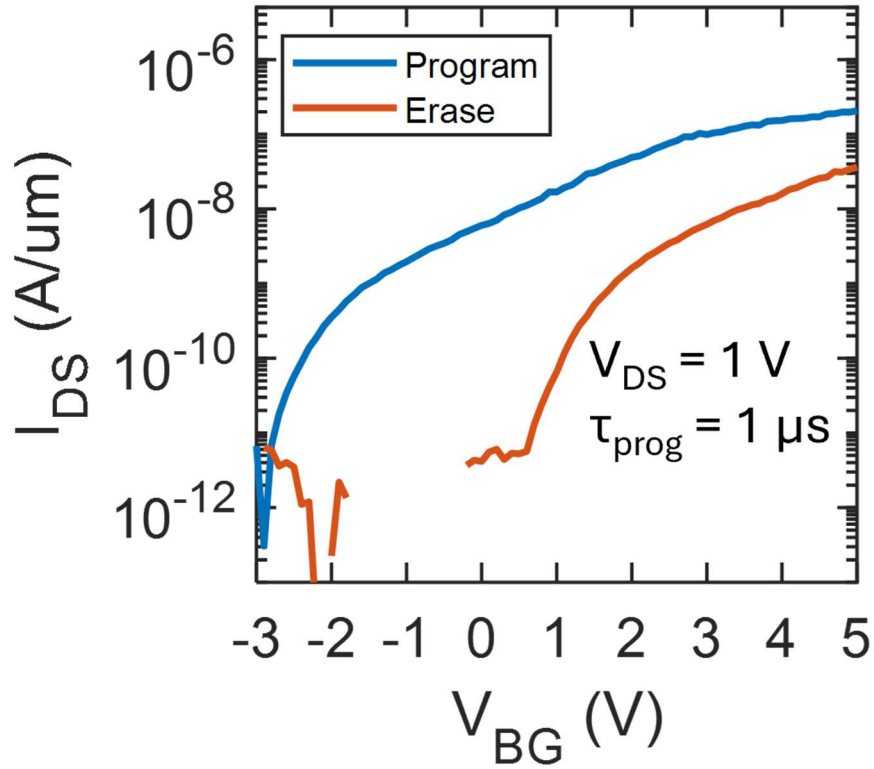

**Figure S6. 1  $\mu s$  Program/Erase Pulse Demonstration.** Transfer characteristics, i.e., drain-to-source current ( $I_{DS}$ ) versus back-gate voltage ( $V_{BG}$ ), taken at  $V_{DS} = 1$  V of a representative memtransistor before and after application of a 1  $\mu s$  programming pulse (-10 V). As can be clearly seen, the pulse shifts the  $V_{th}$  of the device, indicating a shift to a different distinct conductance state (weight). This establishes that 1  $\mu s$  pulse times can program/erase the constituent NVM cells of the crossbar arrays developed and investigated in this work, thus indicating that the arrays may be operated at high speeds (frequencies) than utilized in this work.

### Supplementary Information 8

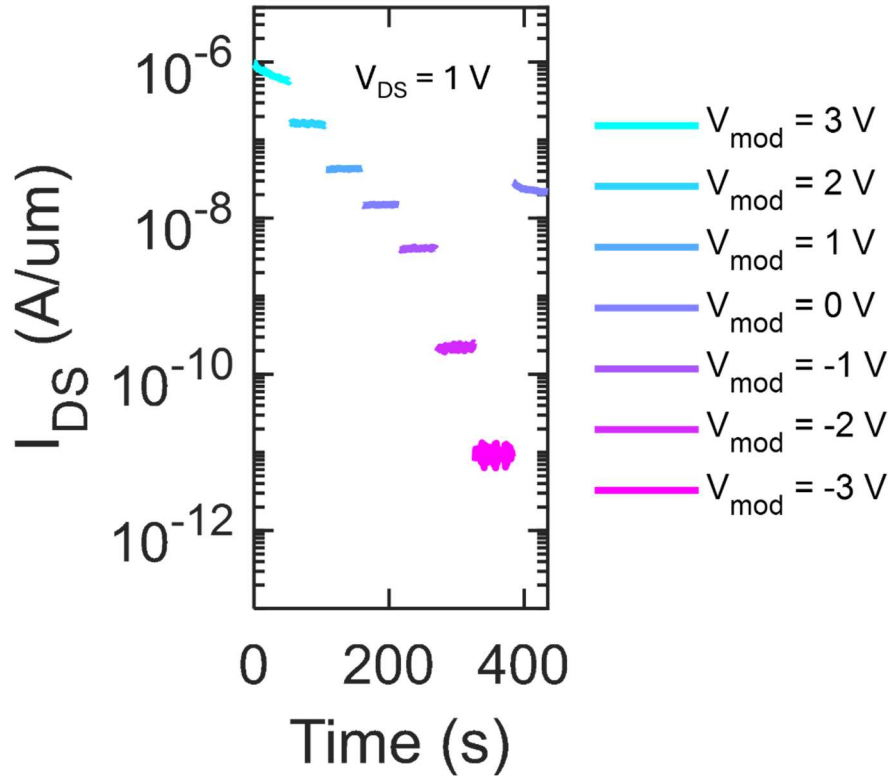

**Figure S7. Demonstration of In-State Conductance/Weight Modulation.**  $I_{DS}$  monitored over time for a representative memristor programmed into the ON-state through the application of a 100 ms, -10 V back-gate bias pulse and subsequently read at different modulatory back-gate biases ( $V_{mod}$ ) for a constant  $V_{DS} = 1$  V. Note that, despite the device being programmed to a set conductance state through the aforementioned programming event, varying  $V_{mod}$  allows for the effective realization of multiple in-state current/conductance levels, thus presenting an avenue for the dynamic potentiation/depression of weights in crossbar arrays through the application of a positive/negative  $V_{mod}$  to the respective gate lines. Also note that, for the case of  $V_{mod} = 0$  V, the same current/conductance level is retained when  $V_{mod}$  switches between values, indicating that this modulatory process does not affect the programmed device state.

## Supplementary Information 9

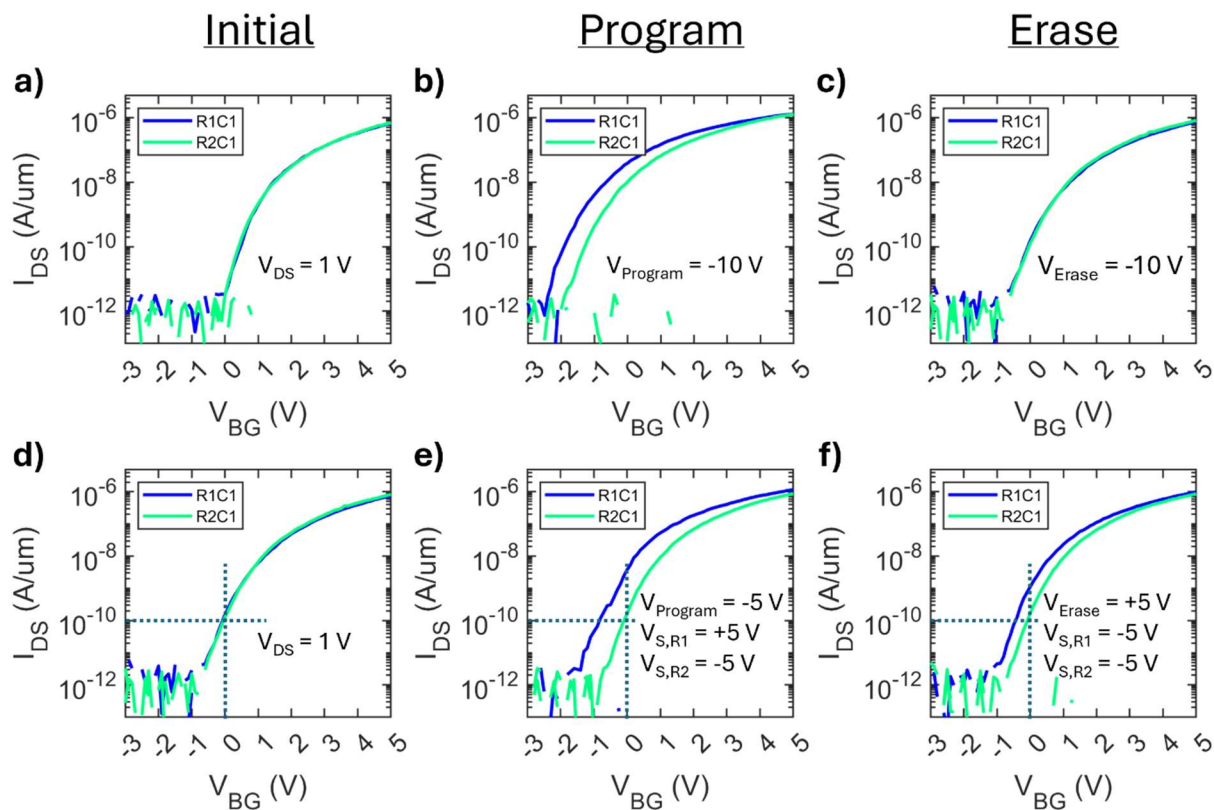

**Figure S8. Bias Scheme Testing.** (a-c) Testing of two devices (R1C1 and R2C1) on the same word/gate-line of a representative MoS<sub>2</sub>-memtransistor-based crossbar array using a full biasing scheme. (a) The as-fabricated devices are read before being (b) programmed to high conductance states using a negative voltage pulse ( $V_{\text{Program}} = -10$  V) and (c) erased to their initial conductance states using a positive voltage pulse ( $V_{\text{Erase}} = +10$  V). All other access lines are held at 0 V during pulsing. (d-f) Testing of R1C1 and R1C2 using a half-biasing scheme. (d) The devices are read before being (e) subjected to a negative gate voltage pulse ( $V_{\text{Program}} = -5$  V) while the source of Row 1 ( $V_{S,R1}$ ) is held at +5 V and the source of Row 2 ( $V_{S,R2}$ ) is held at -5 V. This maximizes the gate-to-source voltage (VGS) across R1C1 while minimizing the VGS across R2C1; as a result, only R1C1 experiences a change in its conductance state. When the biases are then flipped (f), R1C1 is again the only device to display any change, returning closer to its initial conductance state.

### Supplementary Information 10

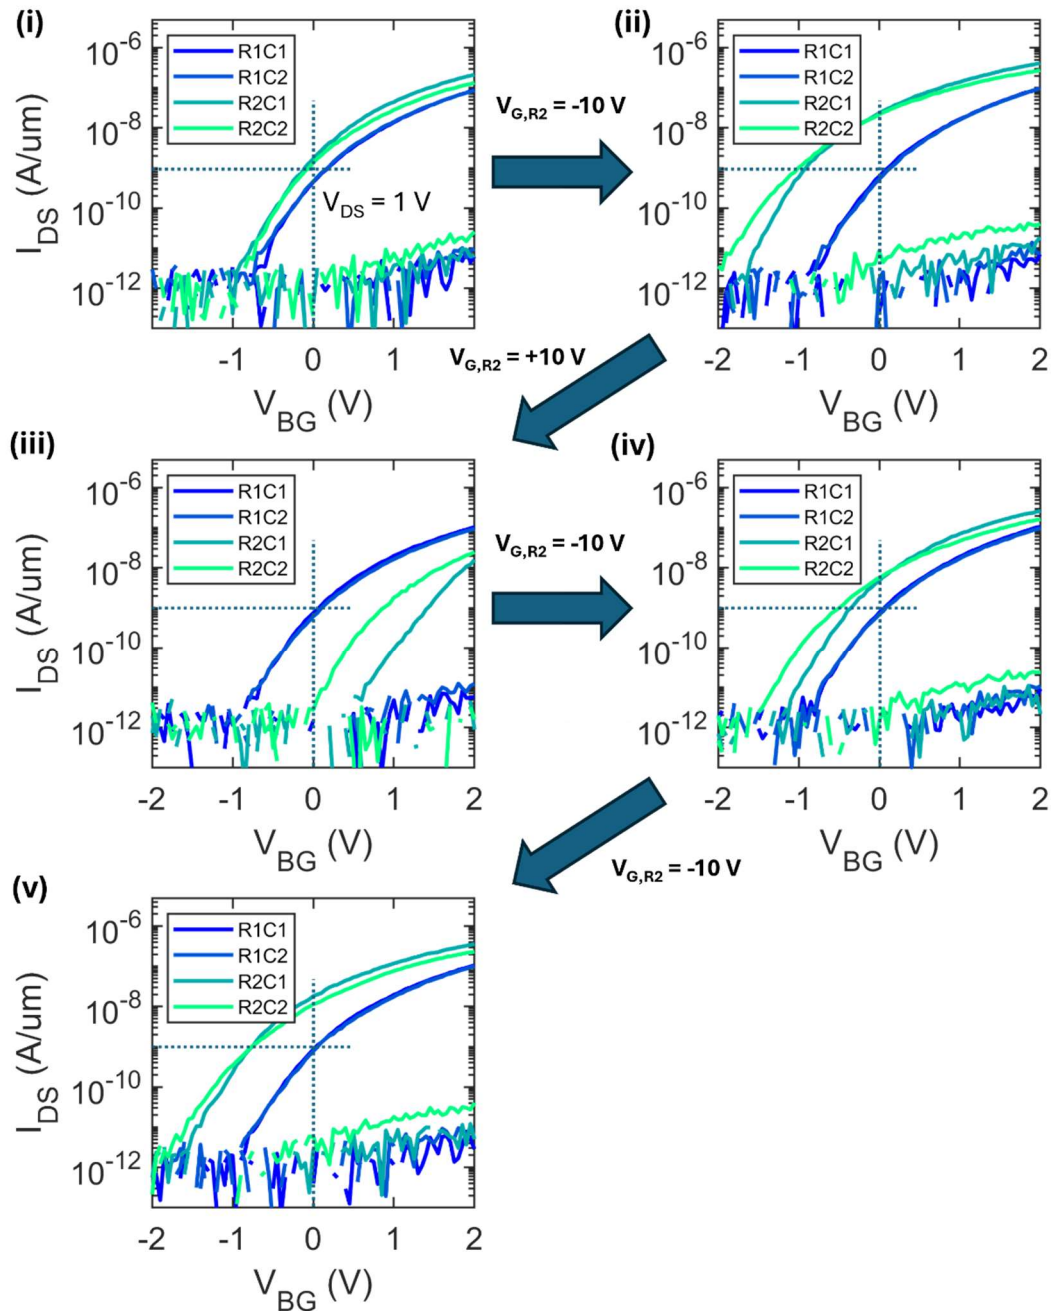

**Figure S9. Word/Gate-Line Isolation Testing.** (i-v) Demonstration of gate line isolation in a representative  $2 \times 2$  crossbar array. Dotted lines are to help show shift in transfer characteristics after each program/erase operation. All four as-fabricated devices in the  $2 \times 2$  array (R1C1, R1C2, R2C1, and R2C2) were read (i) before the word/gate-line in Row 2 (R2) was sequentially subjected to (ii) a  $-10$  V bias pulse ( $V_{G,R2}$ ), (iii) a  $+10$  V bias pulse, (iv) a  $-10$  V bias pulse and (v) a  $-10$  V bias pulse, for 100 ms each. As can be seen, while the devices in R2 (R2C1 and R2C2) were programmed and erased as expected when exposed to negative and positive bias pulses, respectively, the devices in R1 (R1C1 and R1C2) did not show any appreciable shift in their transfer characteristics throughout all applied pulses, confirming the isolation of the separate word/gate lines.

**Supplementary Information 11**

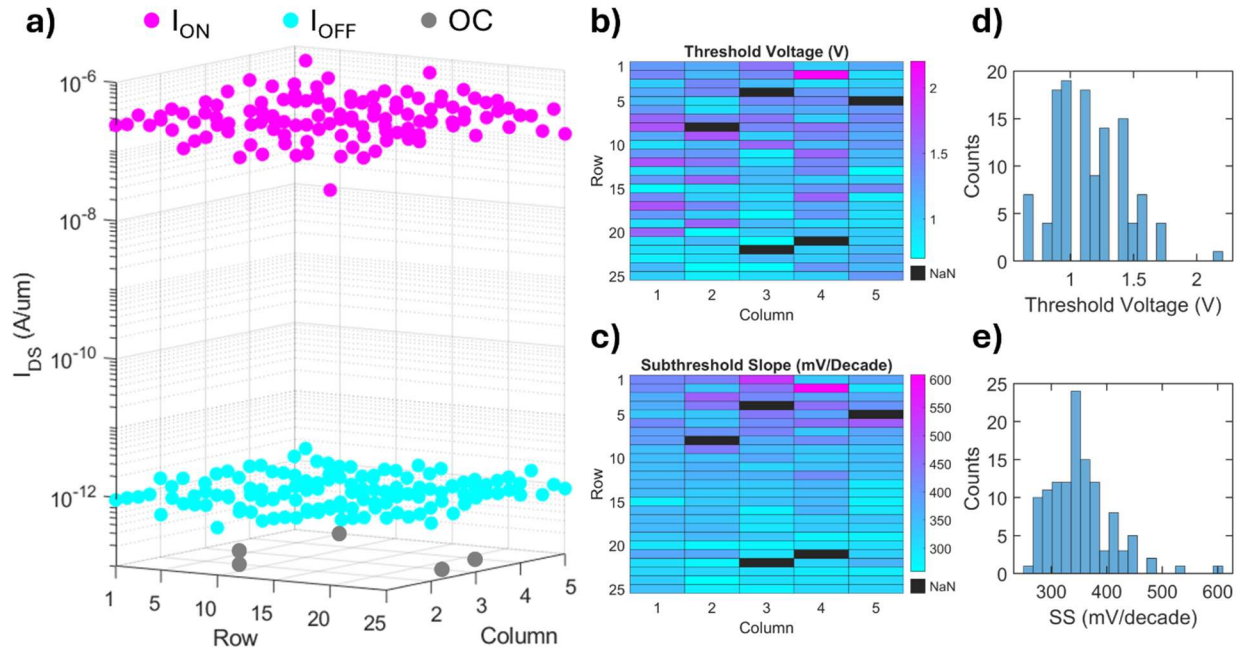

**Figure S10. Overview of 25x5 Sub-Array.** a) Three-dimensional scatter plot showing distribution of  $I_{ON}$  (pink) and  $I_{OFF}$  (cyan) taken at  $V_{DS} = 1$  V across the 25x5 sub-array shown and discussed in **Figure 2**; devices/cells marked in gray registered as an open circuit (OC) when measured. 120/125 devices in the array were found to work (95% yield). b-c) Maps of threshold voltage ( $V_{th}$ ) and subthreshold slope (SS), respectively, across the array. Nonworking devices are marked as NaN. d-e) Histograms of  $V_{th}$  and SS, respectively, for the 120 working devices in the array.

## Supplementary Information 12

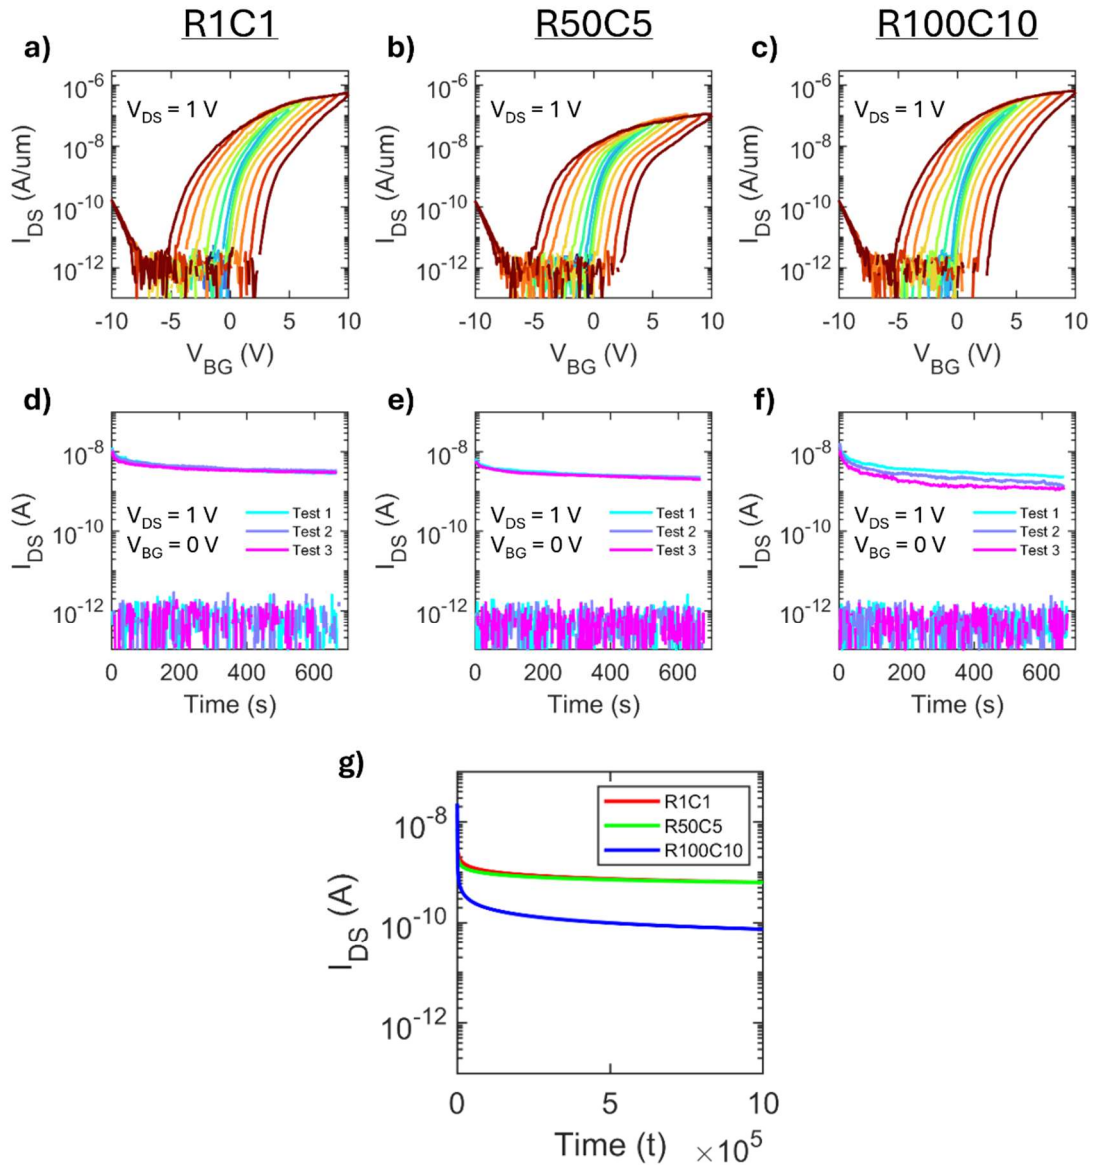

**Figure S11. Memory Testing across 100×10 Crossbar Array.** a-c) Hysteresis loops for devices located at the top (R1C1), middle (R50C5), and bottom (R100C10) of a representative 100×10 array. For each device, multiple hysteresis loops were taken by sweeping the back-gate voltage between +/- 2 V, +/- 3 V, +/- 4 V, +/- 5 V, +/- 6 V, +/- 7 V, +/- 8 V, +/- 9 V, and +/- 10 V so as to determine the presence/size of the memory window for different program/erase voltages; a sizable memory window of ~10 V can be noted for +/- 10 V sweeps irrespective of array position, indicating that array size has minimal effect on program/erase capabilities. d-f) Retention tests for the top, middle, and bottom devices shown in (a-c), respectively. Devices were subjected to a -10 V programming pulse (putting them in the ON-state) and a +10 V erasing pulse (putting them in the OFF-state) and read at a gate voltage of 0 V and drain voltage of 1 V for ~600 seconds (10 minutes) to observe the decay in their ON/OFF ratio over time. This test was conducted three times to observe retention/programming consistency. The timing of each program/erase bias pulse was 100 ms. g) To analyze the long-term retention and uniformity of these devices, a simple power law fit was extracted for the median retention curve of each device and plotted over 10<sup>6</sup> seconds (~11.6 days). The final fitted ON-current values are all >100 pA; if the OFF-current for each device remains constant at ~2 pA, the ON/OFF ratio should remain > 100 for over a week, which is more than sufficient for edge computing applications.

### Supplementary Information 13

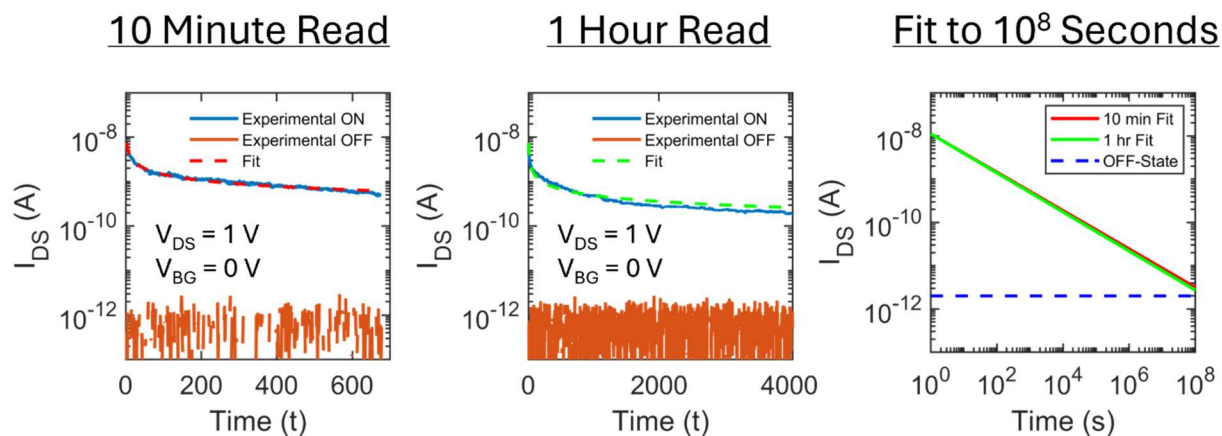

**Figure S12. Long Term Memory Testing.** To verify the accuracy of the fits shown in **Supplemental Information 12**, the ON-state and OFF-state of a representative device/cell were read over periods of ~10 minutes (left column) and ~1 hour (middle column) and simple power law fits were calculated. These fits were then plotted (right column) over  $10^8$  seconds (~3.5 years), during which time they remained above the designated OFF-state current (~2 pA); notably, the 10 minute and 1-hour fits were in close agreement throughout the entire time span, indicating that the 10 minutes fit discussed above are relatively accurate. Additionally, no degradation in the OFF-state was noted even for the longer retention tests, indicating that the change in ON/OFF ratio over time will predominantly depend on the change in ON-state conductance.

## Supplementary Information 14

| Table 2: Comparison to Neural Network Accelerators <sup>1</sup> |          |               |              |                       |                   |                                                        |                 |                   |                                                                                  |                                                                                                                         |                         |
|-----------------------------------------------------------------|----------|---------------|--------------|-----------------------|-------------------|--------------------------------------------------------|-----------------|-------------------|----------------------------------------------------------------------------------|-------------------------------------------------------------------------------------------------------------------------|-------------------------|
| Designation                                                     | Exp./Sim | Type          | Process (nm) | Activation Resolution | Weight Resolution | Clock Speed                                            | Weight Storage  | Array Size        | Throughput (TOPS)                                                                | Density (TOPS/mm <sup>2</sup> )                                                                                         | Reference               |
| MoS <sub>2</sub> -Memtransistor-based Accelerator               | Exp.     | Memtransistor | Custom       | 1 bit                 | 1 bit             | 10 Hz (base)<br>0.250 MHz (peak)<br>10 MHz (projected) | Charge-trapping | 64×10 (Sub-Array) | 4.10×10 <sup>-8</sup> (base)<br>1.02×10 <sup>-3</sup> (peak)<br>0.41 (projected) | 9.47×10 <sup>-7</sup> (base) <sup>2</sup><br>2.37×10 <sup>-3</sup> (peak) <sup>2</sup><br>0.95 (projected) <sup>2</sup> | This Work               |
| Condensed Memtransistor Accelerator (Proj.)                     | Exp.     | Memtransistor | Custom       | 1 bit                 | 1 bit             | 10 MHz                                                 | Charge-trapping | 64×32             | 1.31                                                                             | 6.10 (array-only)                                                                                                       | Projection <sup>3</sup> |
| Dense Memtransistor Accelerator (Proj.)                         | Exp.     | Memtransistor | Custom       | 1 bit                 | 1 bit             | 10 MHz                                                 | Charge-trapping | 64×32             | 1.31                                                                             | 12.4 (array-only)                                                                                                       | Projection <sup>3</sup> |
| NVIDIA T4                                                       | Exp.     | Full-CMOS     | 12           | 8-bit int             | 8-bit int         | 2.6 GHz                                                | NA              | NA                | 22.2, 130 (peak)                                                                 | 0.04, 0.24 (peak)                                                                                                       | [10]                    |
| Google TPU v1                                                   | Exp.     | Full-CMOS     | 28           | 8-bit int             | 8-bit int         | 700 MHz                                                | NA              | NA                | 21.4, 92 (peak)                                                                  | 0.06, 0.28 (peak)                                                                                                       | [11]                    |
| Habana Goya HL-1000                                             | Exp.     | Full-CMOS     | 16           | 16-bit int            | 16-bit int        | 2.1 GHz (CPU)                                          | NA              | NA                | 63.1                                                                             | NA                                                                                                                      | [12]                    |
| DaDianNao                                                       | Sim.     | Full-CMOS     | 28           | 16-bit fixed-pt.      | 16-bit fixed-pt.  | 606 MHz                                                | NA              | NA                | 5.58                                                                             | 0.08                                                                                                                    | [13]                    |
| UNPU                                                            | Exp.     | Full-CMOS     | 65           | 16 bits               | 1 bit             | 200 MHz                                                | NA              | NA                | 7.37                                                                             | 0.46                                                                                                                    | [14]                    |
| Reference mixed-signal                                          | Exp.     | Full-CMOS     | 28           | 1 bit                 | 1 bit             | 10 MHz                                                 | NA              | NA                | 0.478                                                                            | 0.1                                                                                                                     | [15]                    |
| ISAAC                                                           | Exp.     | RRAM-CMOS     | 32           | 16 bits               | 16 bits           | 1.2 GHz                                                | ReRAM           | 128×128           | 41.3                                                                             | 0.48                                                                                                                    | [16]                    |
| Newton                                                          | Exp.     | RRAM-CMOS     | 32           | 16 bits               | 16 bits           | 1.2 GHz                                                | ReRAM           | 128×128           | NA                                                                               | 0.68                                                                                                                    | [17]                    |
| PUMA                                                            | Exp.     | RRAM-CMOS     | 32           | 16 bits               | 16 bits           | 1.0 GHz                                                | ReRAM           | 128×128           | 26.2                                                                             | 0.29                                                                                                                    | [18]                    |
| PRIME                                                           | Sim.     | RRAM-CMOS     | 65           | 6 bits                | 8 bits            | 3.0 GHz (CPU)                                          | ReRAM           | 256×256           | NA                                                                               | NA                                                                                                                      | [19]                    |
| Memristive Boltzmann machine                                    | Sim.     | RRAM-CMOS     | 22           | 32 bits               | 32 bits           | 3.2 GHz (CPU)                                          | ReRAM           | 512×512           | NA                                                                               | NA                                                                                                                      | [20]                    |
| 3D-aCortex                                                      | Exp.     | RRAM-CMOS     | 55           | 4 bits                | 4 bits            | 1.0 GHz                                                | NAND flash      | 64×128            | 10.7                                                                             | 0.58                                                                                                                    | [21]                    |
| Analog-AI Using Dense 2D Mesh                                   | Sim.     | RRAM-CMOS     | 14           | 8 bits                | Analog            | 1.0 GHz                                                | PCM             | 512×512           | 376.7                                                                            | NA                                                                                                                      | [22]                    |

<sup>1</sup>: Adapted from ref. 10, 23 <sup>2</sup>: Array-only estimation <sup>3</sup>: Projection based on current experimental crossbar architectures

NA: Not announced

**Supplemental Table 2. Benchmarking Against Emerging Neural Network Accelerators.** Benchmarking of this work against extant demonstrations of large-scale neural network accelerators<sup>10-23</sup>. We compare against the MNIST inference testing (i.e., digit classification) performed on a 64×10 subsection of the 64×32 (2 kb) array discussed in the main text, though we also include projections for full-scale operations on accelerators using the alternative crossbar architectures detailed in **Supplemental Information 2-3**. The activation and weight resolution are listed as 1 bit (ON/OFF) for our logic accelerators despite the analog nature of our NVMs due to binary images being used for this investigation. For all cases, clock speed is based on the time required for logic operations to be conducted (i.e., read operations when inputs are applied). For our accelerators, base refers to our typical read time of 100 ms (10 Hz), peak refers to our minimum confirmed read time of 4 μs (0.25 MHz), and projected refers to a theoretical clock speed as permitted by the final system (10 MHz). For assessing the throughput of our 64×10 sub-array, the number of columns being utilized at a time was restricted to 1 due to experimental limitations in assessing outputs in parallel; the listed projections are for fully parallelized array operations. A base throughput of 4.10×10<sup>-8</sup> trillion-operations-per-second (TOPS), a peak throughput of 1.02×10<sup>-3</sup> TOPS, and a projected throughput of 0.41 TOPS were estimated for our experimental 64×10 demonstration; this increases to 1.31 TOPS for our projected 64×32 accelerators. Another key metric for logic accelerators is throughput density, often listed in TOPS/mm<sup>2</sup>, as it provides insight into the area efficiency of the in-memory computing architecture. While our peak experimental throughput density remains low, we estimate an impressive throughput density of 0.95 TOPS/mm<sup>2</sup> at a projected clock speed of 10 MHz due to the impressive integration density of even our standard crossbar array architecture. This improves to 6.10 TOPS/mm<sup>2</sup> and 12.4 TOPS/mm<sup>2</sup> for the alternative crossbar architectures due to their higher integration densities (smaller cell areas). Please note that the throughput density estimations given here are for array-level operations only and do not account for any peripheral circuitry or overhead; any consideration of such factors would naturally lead to a decrease in throughput density.

A table comparing the current and predicted status of our work with other emerging logic accelerators for neural networks<sup>10-23</sup> is shown in **Supplementary Table 2**, with most results being adapted from ref. <sup>10, 23</sup>. From our work, we compare against the MNIST classification testing performed on a 64×10 subsection of the 64×32 array discussed in the main text, though we also include projections for operations on accelerators utilizing our alternative crossbar architectures (see **Supplemental Information 2-3**). The activation and weight resolution are both listed as 1-bit (ON/OFF) for our logic accelerators despite the analog nature of our NVMs due to binary images/weights being used for this proof-of-concept investigation. Further testing is needed to assess our ability to accurately and reproducibly assign multiple conductance states before/during logic operations. For all cases, clock speed is based on the time required for logic operations to be conducted (i.e., read operations when inputs are applied). For our accelerators, base refers to our typical read time of 100 ms (10 Hz), peak refers to our minimum confirmed read time of 4 μs (0.25 MHz), and projected refers to a theoretical clock speed as permitted by the final system; here, we use 10 MHz, the minimum clock speed reported for the contemporary works listed in the table, as our projected clock speed for the sake of comparison. The key metric for logic accelerators, throughput, in trillions of operations per second (TOPS), is estimated through the equation:

$$Throughput = \frac{Inputs(Rows \times Columns)}{Time}$$

Here, *Inputs* refers to the number of inputs applied to the array, *Rows* and *Columns* refers to the number of rows and columns in the array being utilized, and *Time* refers to the operational time ( $1/f$ ). For assessing the throughput of our arrays, the number of columns being utilized at a time was restricted to 1 due to experimental limitations in assessing outputs in parallel; improvements in parallelization capabilities would therefore lead to a substantial improvement in throughput for all cases. In this manner, a base throughput of  $4.10 \times 10^{-8}$  TOPS, a peak throughput of  $1.02 \times 10^{-3}$  TOPS, and a projected (fully parallelized) throughput of 0.41 TOPS were estimated for our experimental 64×10 demonstration; this

increases to 1.31 TOPS for projected 64×32 accelerators based on the alternative architectures discussed in **Supplemental Information 2-3**. Another key metric for logic accelerators is throughput density, often listed in TOPS/mm<sup>2</sup>, as it provides insight into the area efficiency of the in-memory computing architecture. While our peak experimental throughput density remains low, we estimate an impressive throughput density of 0.95 TOPS/mm<sup>2</sup> at a projected clock speed of 10 MHz due to the impressive integration density of even our primary crossbar array architecture, as shown in **Supplementary Table 1**. This improves to 6.10 TOPS/mm<sup>2</sup> and 12.4 TOPS/mm<sup>2</sup> for the designs discussed in **Supplementary Information 2-3**, respectively, due to their higher integration densities (smaller cell areas), indicating that our MoS<sub>2</sub>-memtransistor-based crossbar array architectures have significant promise for dense, high throughput logic accelerators even in comparison to state-of-the-art technologies. Please note that the throughput density estimations given here are for array-level operations only and do not account for any peripheral circuitry or overhead; such factors would naturally lead to a decrease in throughput density but may in turn be offset by future developments in monolithically-integrated crossbar array architectures stacked directly on top of CMOS hardware<sup>24-26</sup>.

## References

1. Marega, G. M.; Ji, H. G.; Wang, Z.; Pasquale, G.; Tripathi, M.; Radenovic, A.; Kis, A., A large-scale integrated vector–matrix multiplication processor based on monolayer molybdenum disulfide memories. *Nature Electronics* **2023**, *6* (12), 991-998.
2. Feng, X.; Li, S.; Wong, S. L.; Tong, S.; Chen, L.; Zhang, P.; Wang, L.; Fong, X.; Chi, D.; Ang, K.-W., Self-Selective Multi-Terminal Memtransistor Crossbar Array for In-Memory Computing. *ACS Nano* **2021**, *15* (1), 1764-1774.
3. Lee, H.-S.; Sangwan, V. K.; Rojas, W. A. G.; Bergeron, H.; Jeong, H. Y.; Yuan, J.; Su, K.; Hersam, M. C., Dual-Gated MoS<sub>2</sub> Memtransistor Crossbar Array. *Advanced Functional Materials* **2020**, *30* (45).
4. Fu, S.; Park, J.-H.; Gao, H.; Zhang, T.; Ji, X.; Fu, T.; Sun, L.; Kong, J.; Yao, J., Two-Terminal MoS<sub>2</sub> Memristor and the Homogeneous Integration with a MoS<sub>2</sub> Transistor for Neural Networks. *Nano Letters* **2023**, *23* (13), 5869-5876.
5. Kumar, P.; Zhu, K.; Gao, X.; Wang, S.-D.; Lanza, M.; Thakur, C. S., Hybrid architecture based on two-dimensional memristor crossbar array and CMOS integrated circuit for edge computing. *npj 2D Materials and Applications* **2022**, *6* (1).
6. Bala, A.; Sen, A.; Shim, J.; Gandla, S.; Kim, S., Back-End-of-Line Compatible Large-Area Molybdenum Disulfide Grown on Flexible Substrate: Enabling High-Performance Low-Power Memristor Applications. *ACS Nano* **2023**, *17* (14), 13784–13791.
7. Naqi, M.; Kang, M. S.; Liu, N.; Kim, T.; Baek, S.; Bala, A.; Moon, C.; Park, J.; Kim, S., Multilevel artificial electronic synaptic device of direct grown robust MoS<sub>2</sub> based memristor array for in-memory deep neural network. *npj 2D Materials and Applications* **2022**, *6* (1).
8. Tang, B.; Veluri, H.; Li, Y.; Yu, Z. G.; Waqar, M.; Leong, J. F.; Sivan, M.; Zamburg, E.; Zhang, Y.-W.; Wang, J.; Thean, A. V.-Y., Wafer-scale solution-processed 2D material analog resistive memory array for memory-based computing. *Nature Communications* **2022**, *13* (1).
9. Chen, S.; Mahmoodi, M. R.; Shi, Y.; Mahata, C.; Yuan, B.; Liang, X.; Wen, C.; Hui, F.; Akinwande, D.; Strukov, D. B.; Lanza, M., Wafer-scale integration of two-dimensional materials in high-density memristive crossbar arrays for artificial neural networks. *Nature Electronics* **2020**, *3* (10), 638-645.
10. Xiao, T. P.; Bennett, C. H.; Feinberg, B.; Agarwal, S.; Marinella, M. J., Analog architectures for neural network acceleration based on non-volatile memory. *Applied Physics Reviews* **2020**, *7* (3).
11. Jouppi, N. P.; Young, C.; Patil, N.; Patterson, D.; Agrawal, G.; Bajwa, R.; Bates, S.; Bhatia, S.; Boden, N.; Borchers, A.; Boyle, R.; Cantin, P.-I.; Clifford Chao; Clark, C.; Coriell, J.; Daley, M.; Dau, M.; Dean, J.; Gelb, B.; Ghaemmaghami, T. V.; Gottipati, R.; Gulland, W.; Hagmann, R.; Ho, C. R.; Hogberg, D.; Hu, J.; Hundt, R.; Hurt, D.; Ibarz, J.; Jaffey, A.; Jaworski, A.; Kaplan, A.; Khaitan, H.; Killebrew, D.; Koch, A.; Kumar, N.; Lacy, S.; Laudon, J.; Law, J.; Le, D.; Leary, C.; Liu, Z.; Lucke, K.; Lundin, A.; MacKean, G.; Maggiore, A.; Mahony, M.; Miller, K.; Nagarajan, R.; Narayanaswami, R.; Ni, R.; Nix, K.; Norrie, T.; Omernick, M.; Penukonda, N.; Phelps, A.; Ross, J.; Ross, M.; Salek, A.; Samadiani, E.; Severn, C.; Sizikov, G.; Snelham, M.; Souter, J.; Steinberg, D.; Swing, A.; Tan, M.; Thorson, G.; Tian, B.; Toma, H.; Tuttle, E.; Vasudevan, V.; Walter, R.; Wang, W.; Wilcox, E.; Yoon, D. H. In *In-Datcenter Performance Analysis of a Tensor Processing Unit*, International Symposium on Computer Architecture, 2017.
12. Ltd., H. L. *Goya™ Inference Platform White Paper*; 2019; pp 1-14.
13. Chen, Y.; Luo, T.; Liu, S.; Zhang, S.; He, L.; Wang, J.; Li, L.; Chen, T.; Xu, Z.; Sun, N.; Temam, O., DaDianNao: A Machine-Learning Supercomputer. In *IEEE/ACM International Symposium on Microarchitecture*, IEEE: Cambridge, UK, 2014; pp 609-622.

14. Lee, J.; Kim, C.; Kang, S.; Shin, D.; Kim, S.; Yoo, H.-J., UNPU: An Energy-Efficient Deep Neural Network Accelerator With Fully Variable Weight Bit Precision. *IEEE Journal of Solid-State Circuits* **2018**, *54* (1), 173-185.
15. Bankman, D.; Yang, L.; Moons, B.; Verhelst, M.; Murmann, B., An Always-On 3.8  $\mu\text{m}$ /86% CIFAR-10 Mixed-Signal Binary CNN Processor With All Memory on Chip in 28-nm CMOS. *IEEE Journal of Solid-State Circuits* **2019**, *54* (1), 158-172.
16. Shafiee, A.; Nag, A.; Muralimanohar, N.; Balasubramonian, R.; Strachan, J. P.; Hu, M.; Williams, R. S.; Srikumar, V., ISAAC: A Convolutional Neural Network Accelerator with In-Situ Analog Arithmetic in Crossbars. *ACM SIGARCH Computer Architecture News* **2016**, *44* (3), 14-26.
17. Nag, A.; Balasubramonian, R.; Srikumar, V.; Walker, R.; Shafiee, A.; Strachan, J. P.; Muralimanohar, N., Newton: Gravitating Towards the Physical Limits of Crossbar Acceleration. *IEEE Micro* **2018**, *38* (5), 41-49.
18. Ankit, A.; Hajj, I. E.; Chalamalasetti, S. R.; Ndu, G.; Foltin, M.; Williams, R. S.; Faraboschi, P.; Hwu, W.-m.; Strachan, J. P.; Roy, K.; Milojevic, D. S. In *PUMA: A Programmable Ultra-efficient Memristor-based Accelerator for Machine Learning Inference*, International Conference on Architectural Support for Programming Languages and Operating Systems, 2019; pp 715-731.
19. Chi, P.; Li, S.; Xu, C.; Zhang, T.; Zhao, J.; Liu, Y.; Wang, Y.; Xie, Y., PRIME: a novel processing-in-memory architecture for neural network computation in ReRAM-based main memory. *ACM SIGARCH Computer Architecture News* **2016**, *44* (3), 27-39.
20. Bojnordi, M. N.; Ipek, E., Memristive Boltzmann machine: A hardware accelerator for combinatorial optimization and deep learning. In *IEEE International Symposium on High Performance Computer Architecture*, 2016; pp 1-13.
21. Bavandpour, M.; Sahay, S.; Mahmoodi, M. R.; Strukov, D. B., 3D-aCortex: an ultra-compact energy-efficient neurocomputing platform based on commercial 3D-NAND flash memories. *Neuromorphic Computing and Engineering* **2021**, *1* (1).
22. Jain, S.; Tsai, H.; Chen, C.-T.; Muralidhar, R.; Boybat, I.; Frank, M. M.; Wozniak, S.; Stanisavljevic, M.; Adusumilli, P.; Narayanan, P.; Hosokawa, K.; Ishii, M.; Kumar, A.; Narayanan, V.; Burr, G. W., A Heterogeneous and Programmable Compute-In-Memory Accelerator Architecture for Analog-AI Using Dense 2-D Mesh. *IEEE Transactions on Very Large Scale Integration (VLSI) Systems* **2023**, *31* (1), 114-127.
23. Aguirre, F.; Sebastian, A.; Gallo, M. L.; Song, W.; Wang, T.; Yang, J. J.; Lu, W.; Chang, M.-F.; Ielmini, D.; Yang, Y.; Mehonic, A.; Kenyon, A.; Villena, M. A.; Roldán, J. B.; Wu, Y.; Hsu, H.-H.; Raghavan, N.; Suñé, J.; Miranda, E.; Eltawil, A.; Setti, G.; Smagulova, K.; Salama, K. N.; Krestinskaya, O.; Yan, X.; Ang, K.-W.; Jain, S.; Li, S.; Alharbi, O.; Pazos, S.; Lanza, M., Hardware implementation of memristor-based artificial neural networks. *Nature Communications* **2024**, *15* (1).
24. Jayachandran, D.; Pendurthi, R.; Sadaf, M. U. K.; Sakib, N. U.; Pannone, A.; Chen, C.; Han, Y.; Trainor, N.; Kumari, S.; McKnight, T. V.; Redwing, J. M.; Yang, Y.; Das, S., Three-dimensional integration of two-dimensional field-effect transistors. *Nature* **2024**, *625* (7994), 276-281.
25. Pendurthi, R.; Sakib, N. U.; Sadaf, M. U. K.; Zhang, Z.; Sun, Y.; Chen, C.; Jayachandran, D.; Oberoi, A.; Ghosh, S.; Kumari, S.; Stepanoff, S. P.; Somvanshi, D.; Yang, Y.; Redwing, J. M.; Wolfe, D. E.; Das, S., Monolithic three-dimensional integration of complementary two-dimensional field-effect transistors. *Nature Nanotechnology* **2024**, *19* (7), 970-977.
26. Ghosh, S.; Zheng, Y.; Zhang, Z.; Sun, Y.; Schranghamer, T. F.; Sakib, N. U.; Oberoi, A.; Chen, C.; Redwing, J. M.; Yang, Y.; Das, S., Monolithic and heterogeneous three-dimensional integration of two-dimensional materials with high-density vias. *Nature Electronics* **2024**, *7* (892–903).
